# Supplementary material for: A Large Case-Control Study Performed in Spanish Population Suggests That RECQL5 Is the Only RECQ Helicase Involved in Breast Cancer Susceptibility
Source: MDPI journal article supplement (doi:10.3390/cancers14194738), 2022-09-28
Supplement: s1 [file s1]

**Table S2.** Missense and synonymous variants with likely LoF prediction gathered in the 1993 samples.

| Gene          | Nucleotide Change | Protein Change | P | M | SG | MA | F | C | MP | S | PPS | Prediction | Splicing | Varsome        | Franklin       | Previously Found |
|---------------|-------------------|----------------|---|---|----|----|---|---|----|---|-----|------------|----------|----------------|----------------|------------------|
| <i>RECQL</i>  | c.385T>G          | p.Cys129Gly    | D | D | D  | T  | T | D | D  | D | T   | YES        | NO       | VUS (PM2, PP3) | VUS (PM2)      | <sup>3</sup>     |
|               | c.386G>A          | p.Cys129Tyr    | D | D | D  | T  | T | D | D  | D | T   | YES        | NO       | VUS (PM2, PP3) | VUS (PM2)      | <sup>3</sup>     |
|               | c.401C>T          | p.Thr134Ile    | D | D | T  | D  | T | D | D  | D | T   | YES        | NO       | VUS (PM2, PP3) | PB (BS1, BP6)  | NR               |
|               | c.1643A>C         | p.His548Pro    | D | D | D  | D  | T | D | D  | D | D   | YES        | NO       | VUS (PM2)      | VUS (PM2)      | NR               |
|               | c.1184T>C         | p.Met395Thr    | D | D | D  | T  | T | D | T  | D | T   | YES        | NO       | VUS (PM2, PP3) | VUS (PM2)      | <sup>3</sup>     |
|               | c.49G>A           | p.Glu17Lys     | D | T | T  | D  | T | D | D  | D | T   | YES        | YES      | VUS (PM2, PP3) | VUS (PM2)      | <sup>3</sup>     |
|               | c.863A>T          | p.Tyr288Phe    | D | D | T  | T  | T | D | D  | D | T   | YES        | NO       | VUS (PM2, PP3) | VUS (PM2, PP3) | NR               |
| <i>BLM</i>    | c.1211G>A         | p.Arg404Gln    | D | T | D  | D  | T | D | D  | D | T   | YES        | NO       | VUS (PM2)      | VUS (PM2)      | NR               |
|               | c.2498C>T         | p.Ala833Val    | D | D | D  | D  | T | D | D  | D | D   | YES        | NO       | VUS (PM2, PP3) | VUS (PM2)      | NR               |
|               | c.47A>G           | p.His16Arg     | D | T | D  | D  | T | D | T  | D | D   | YES        | NO       | VUS (PM2, PP3) | VUS (PM2)      | NR               |
|               | c.2909T>C         | p.Val970Ala    | D | D | D  | T  | T | D | T  | D | T   | YES        | NO       | VUS (PM2)      | VUS (PM2)      | NR               |
|               | c.2474C>T         | p.Pro825Leu    | D | D | D  | D  | T | T | D  | D | D   | YES        | NO       | VUS (PM2, PP3) | VUS (PM2)      | NR               |
|               | c.4240T>C         | p.Tyr1414His   | D | T | T  | D  | T | D | T  | D | D   | YES        | NO       | VUS (PM2)      | VUS (PM2)      | NR               |
|               | c.2141C>G         | p.Ser714Cys    | D | D | D  | D  | T | D | D  | D | D   | YES        | NO       | VUS (PM2, PP3) | VUS (PM2, PP3) | NR               |
| <i>WRN</i>    | c.475G>A          | p.Asp159Asn    | D | T | D  | D  | T | D | D  | D | T   | YES        | NO       | VUS (PM2, PP3) | VUS (PM2)      | NR               |
|               | c.2923G>A         | p.Glu975Lys    | D | T | D  | D  | T | D | T  | T | D   | YES        | NO       | VUS (PM2, BP4) | VUS (PM2, BP4) | NR               |
|               | c.2822C>A         | p.Ser941Tyr    | D | T | T  | D  | T | T | T  | T | T   | NO         | YES      | VUS (PM2, BP4) | VUS (PM2, BP4) | NR               |
|               | c.2029G>A         | p.Gly677Arg    | D | T | D  | D  | T | D | D  | D | D   | YES        | NO       | VUS (PM2, PP3) | VUS (PM2, BS2) | NR               |
|               | c.2034T>A         | p.His678Gln    | D | D | D  | D  | T | D | D  | D | T   | YES        | NO       | VUS (PM2, PP3) | VUS (PM2)      | NR               |
|               | c.3003C>G         | p.His1001Gln   | D | T | T  | D  | T | T | D  | D | D   | YES        | NO       | VUS (PM2, BP4) | VUS (PM2)      | NR               |
|               | c.2132G>A         | p.Arg711Gln    | D | T | D  | T  | T | T | T  | D | D   | NO         | YES      | VUS (PM2, BP4) | VUS (PM2, BP4) | NR               |
| <i>RECQL4</i> | c.1455C>T         | p.=            | - | - | -  | -  | - | - | -  | - | -   | NO         | YES      | PB (BP4, BP7)  | VUS (PM2, BP7) | NR               |
|               | c.2351G>A         | Arg784Gln      | D | D | T  | D  | T | T | D  | D | D   | YES        | NO       | VUS (PM2)      | VUS (PM2)      | NR               |
|               | c.2425G>A         | p.Gly809Arg    | D | T | D  | D  | T | T | D  | D | D   | YES        | NO       | VUS (PM2)      | VUS (PM2)      | NR               |
|               | c.2362C>T         | p.His788Tyr    | D | D | D  | D  | T | T | D  | D | D   | YES        | NO       | VUS (PM2, PP3) | VUS (PM2)      | NR               |

|               |           |             |   |   |   |   |   |   |   |   |   |     |     |                   |                |    |
|---------------|-----------|-------------|---|---|---|---|---|---|---|---|---|-----|-----|-------------------|----------------|----|
|               | c.1853G>A | p.Arg618Gln | D | D | D | T | T | T | T | D | D | YES | NO  | VUS (PM2)         | VUS (PM2)      | NR |
|               | c.2765C>T | Thr922Ile   | D | D | D | D | T | T | D | D | D | YES | NO  | VUS (PM2)         | VUS (PM2)      | NR |
| <b>RECQL5</b> | c.1712C>G | p.Ala571Gly | T | D | T | T | T | T | T | T | T | NO  | YES | VUS (PM2, BP4)    | VUS (PM2, BP4) | NR |
|               | c.130G>A  | p.Gly44Ser  | T | T | D | D | T | D | T | T | T | NO  | YES | PP (PM2, PP3)     | VUS (PM2, PP3) | NR |
|               | c.1534A>G | p.Met512Val | D | T | T | D | T | T | T | T | T | NO  | YES | VUS-PP (PM2, PP3) | VUS (PM2)      | NR |
|               | c.569C>G  | p.Ala190Gly | D | D | T | D | T | T | D | D | D | YES | NO  | VUS-PP (PM2)      | VUS (PM2)      | NR |
|               | c.1601T>C | p.Leu534Pro | D | D | D | D | T | D | D | D | D | YES | NO  | VUS-PP (PM2, PP3) | VUS (PM2)      | NR |
|               | c.2926C>T | p.Arg976Trp | D | T | D | D | T | T | T | D | D | YES | NO  | VUS (PM2)         | VUS (PM2)      | NR |
|               | c.1648C>T | p.Arg550Trp | D | T | D | T | T | D | D | D | D | YES | NO  | VUS (PM2, PP3)    | VUS (PM2)      | NR |
|               | c.305C>T  | p.Ser102Leu | D | T | T | T | T | D | D | D | D | YES | NO  | VUS-PP (PM2, PP3) | VUS (PM2)      | NR |
|               | c.1564A>G | p.Ile522Val | D | T | T | D | T | D | T | D | T | NO  | YES | VUS (PM2, BP4)    | VUS (PM2, BP4) | NR |

P: polyphen-2; M: MUTTASTER; SG: SNPs&Go; MA: MutationAssesor; F: FATHMM; C: Condel; MP: MutPred; S: SIFT; D: Deleterious; T: Tolerated; PPS Score was calculated with SNAP2 algorithm (<https://www.predictprotein.org/>). Scores >50 were considered likely LoF. Prediction: YES: Missense variant considered likely LoF by at least 5/8 predictors. Splicing: YES: based on the splicing module integrated in Alamut Visual 2.7.2. Varsome and Franklin prediction of pathogenicity based on ACMG guidelines. VUS: Variant of Unknown Significance; PP: Probably Pathogenic; PB: Probably Benign. PM2: absent variant in controls or a steeply low frequency in Exome Sequencing Project, 1000 Genomes or ExAC. PP3: pathogenic evidence demonstrated from models and computational predictions. BP4: benign effect proven through models and computational predictions. BP6: reported variants as benign, but with not enough evidence to evaluate them independently. BP7: synonymous variant with negative splicing alteration prediction from each platform. Strong benign evidence: BS1: allele frequency higher than expected in variants involved in diseases. BS2: variant observed in a healthy adult and in a recessive illness with complete penetrance.
