# Supplementary material for: A Large Case-Control Study Performed in Spanish Population Suggests That RECQL5 Is the Only RECQ Helicase Involved in Breast Cancer Susceptibility
Source: MDPI journal article supplement (doi:10.3390/cancers14194738), 2022-09-28
Supplement: s1 [file s1]

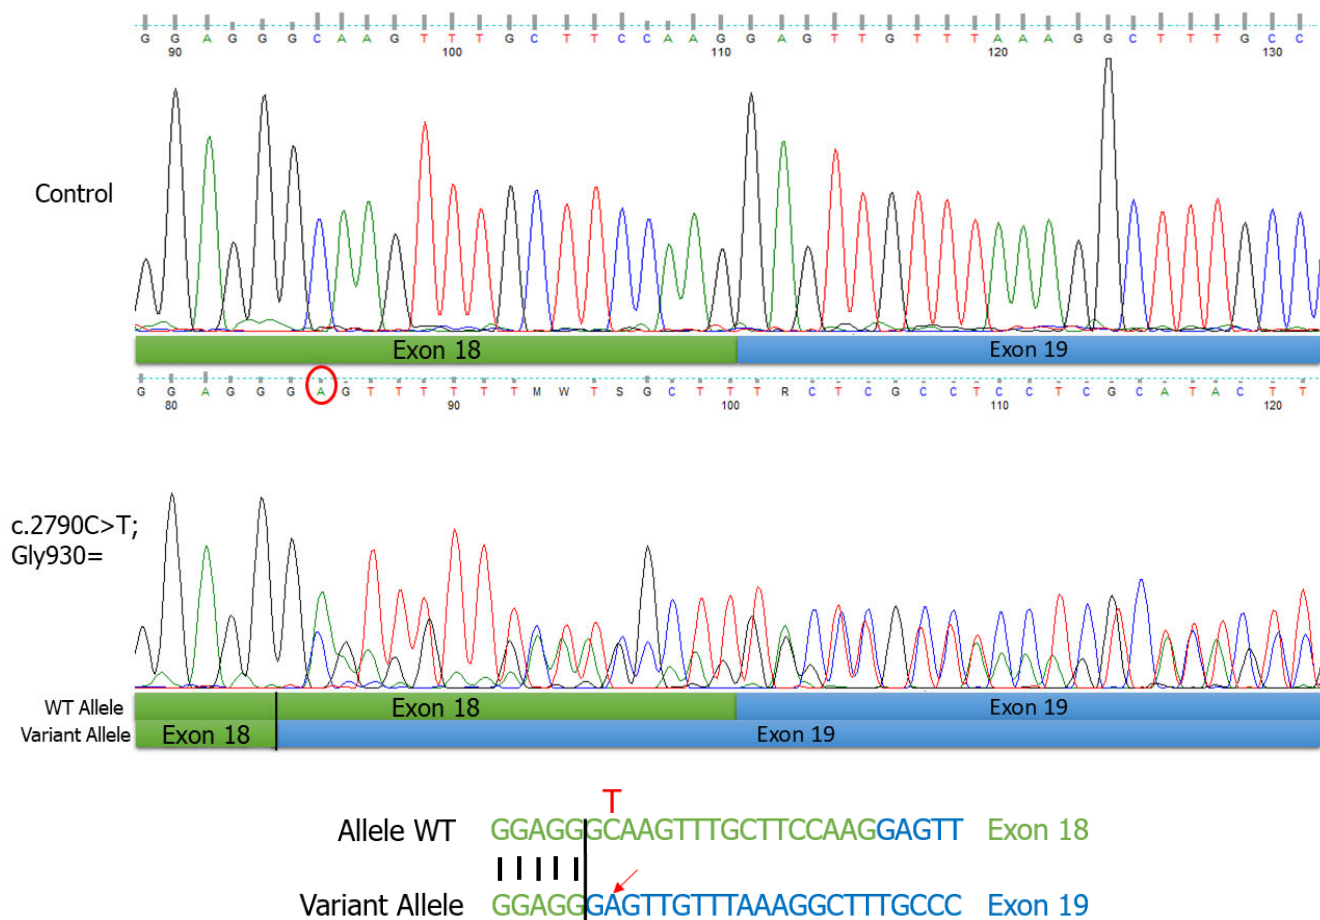

**Figure S1.** Sanger sequencing of the patient harboring the c.2790C>T; Gly930= synonymous variant in RECQL5 at cDNA level (lower figure) and a control sample (upper figure). The circle and arrow in red indicate the point where the change is located. The C>T change generates a GT cryptic splicing donor site at the end of exon 18, leading to the cut before these two nucleotide and generating a loss of the last 17 nucleotides of the exon and the generation of a premature stop codon in the penultimate coding exon of the gene (p.(Lys931Serfs\*14).
