# Supplementary material for: A Large Case-Control Study Performed in Spanish Population Suggests That RECQL5 Is the Only RECQ Helicase Involved in Breast Cancer Susceptibility
Source: MDPI journal article supplement (doi:10.3390/cancers14194738), 2022-09-28
Supplement: s1 [file s1]

**Table S1.** Breast tumor immunohistochemical features of the *RECQL5* LoF variant heterozygotes.

| <b>Mutation</b>                 | <b>Type of tumor</b> | <b>Age of onset</b> | <b>ER status</b> | <b>PR status</b> | <b>Her2 status</b> |
|---------------------------------|----------------------|---------------------|------------------|------------------|--------------------|
| p.Gly44Ser                      | IDC                  | 49                  | NA               | NA               | NA                 |
| p.Gly44Ser <sup>a</sup>         | NA                   | 50                  | NA               | NA               | NA                 |
| p.Ser958Arg <sup>a</sup>        | NA                   | 26                  | Positive         | Positive         | NA                 |
| p.Ser958Arg                     | IDC                  | 48                  | Positive         | Positive         | Negative           |
| p.Ser958Arg                     | NA                   | 78                  | NA               | NA               | NA                 |
| c.2790C>T; (p.=)                | DCIS                 | 39                  | Negative         | Negative         | NA                 |
| p.Arg770Ter                     | NA                   | 44                  | NA               | NA               | NA                 |
| p.Cys220AlafsTer15              | ILC+IDC              | 34                  | NA               | NA               | NA                 |
| p.Cys220AlafsTer15 <sup>a</sup> | NA                   | 34                  | Negative         | Negative         | Negative           |
| p.Met799Aspfs*24 <sup>a</sup>   | NA                   | 37                  | Negative         | Negative         | Negative           |

<sup>a</sup>Variants from Tavera-Tapia 2019. NA, Not Available. ER=estrogen receptor. PR=Progesterone receptor. IDC=Invasive Ductal Carcinoma. DCIS=Ductal Carcinoma *in situ*. ILC= Invasive Lobulillar Carcinoma.
